# Supplementary material
Source: Springer Nature journal article supplement (https://www.springermedizin.de/resource/supplementary/12891_2009_775_MOESM1_ESM.pdf/9506982)

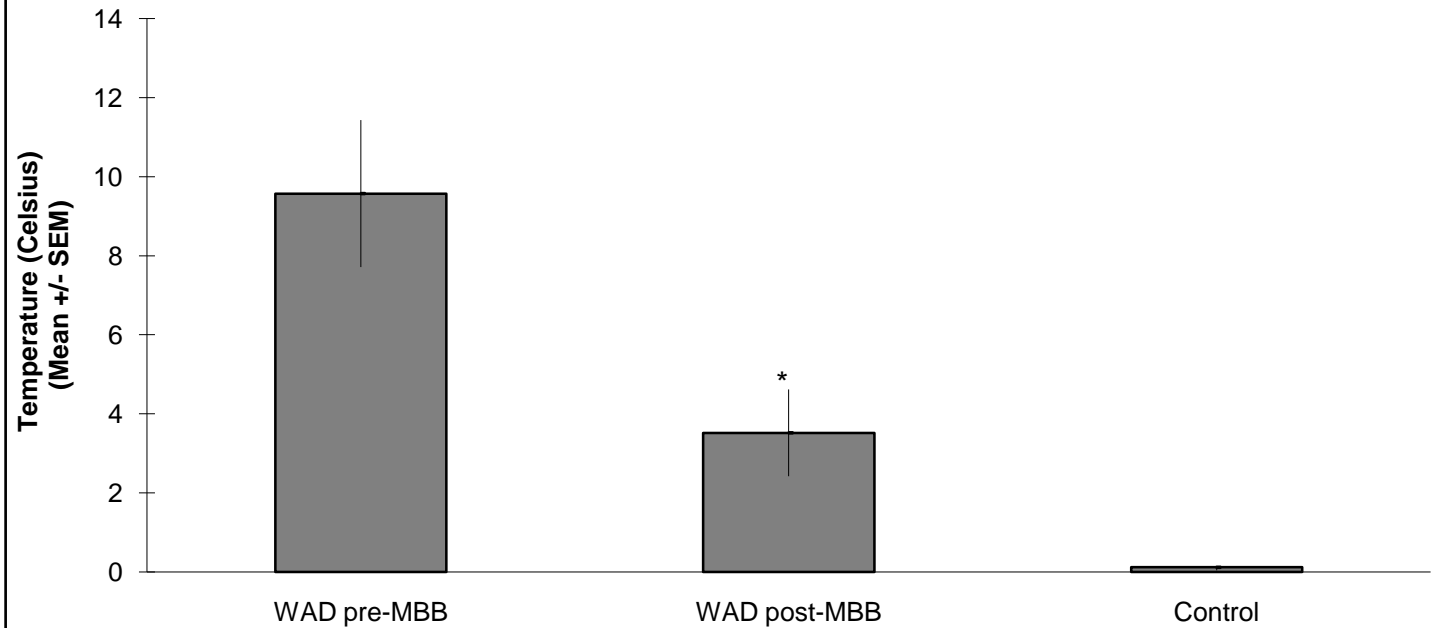

\*Significant difference between WAD pre-MBB and WAD post-MBB ( $p < .001$ )

Supplement: MOESM1 [file 9506982]
